# Supplementary material for: Chromatin dysregulation and DNA methylation at transcription start sites associated with transcriptional repression in cancers
Source: PubMed Central journal article supplement (PMC6522544; doi:10.1038/s41467-019-09937-w), 2019-05-16
Supplement: 41467_2019_9937_MOESM3_ESM.pdf [file 41467_2019_9937_MOESM3_ESM.pdf]

## Description of Additional Supplementary Information

File Name: Supplementary Data 1

Description: List of selected 59 genes that exhibited strongly significant (FDR  $q < 0.001$ ) negative correlation between DNA methylation and RNA expression levels in the discovery cohort.

File Name: Supplementary Data 2

Description: Lists of genes leading to the enrichment of pathways in the discovery cohort: motif gene sets (C3).

File Name: Supplementary Data 3

Description: Lists of genes leading to the enrichment of pathways in the discovery cohort: hallmark gene sets (H).

File Name: Supplementary Data 4

Description: Lists of genes leading to the enrichment of pathways in the discovery cohort: curated gene sets (C2).

File Name: Supplementary Data 5

Description: a) MuTect analysis. b) VarDict analysis.
